# Supplementary material for: 1H quantitative NMR and UHPLC-MS analysis of seized MDMA/NPS mixtures and tablets from night-club venues
Source: Royal Society of Chemistry journal article supplement (doi:10.1039/c9ay01403a), 2019-01-01
Supplement: c9ay01403a1.pdf [file c9ay01403a1.pdf]

## Electronic Supplementary Information (ESI)

Two figures (S1 and S2)

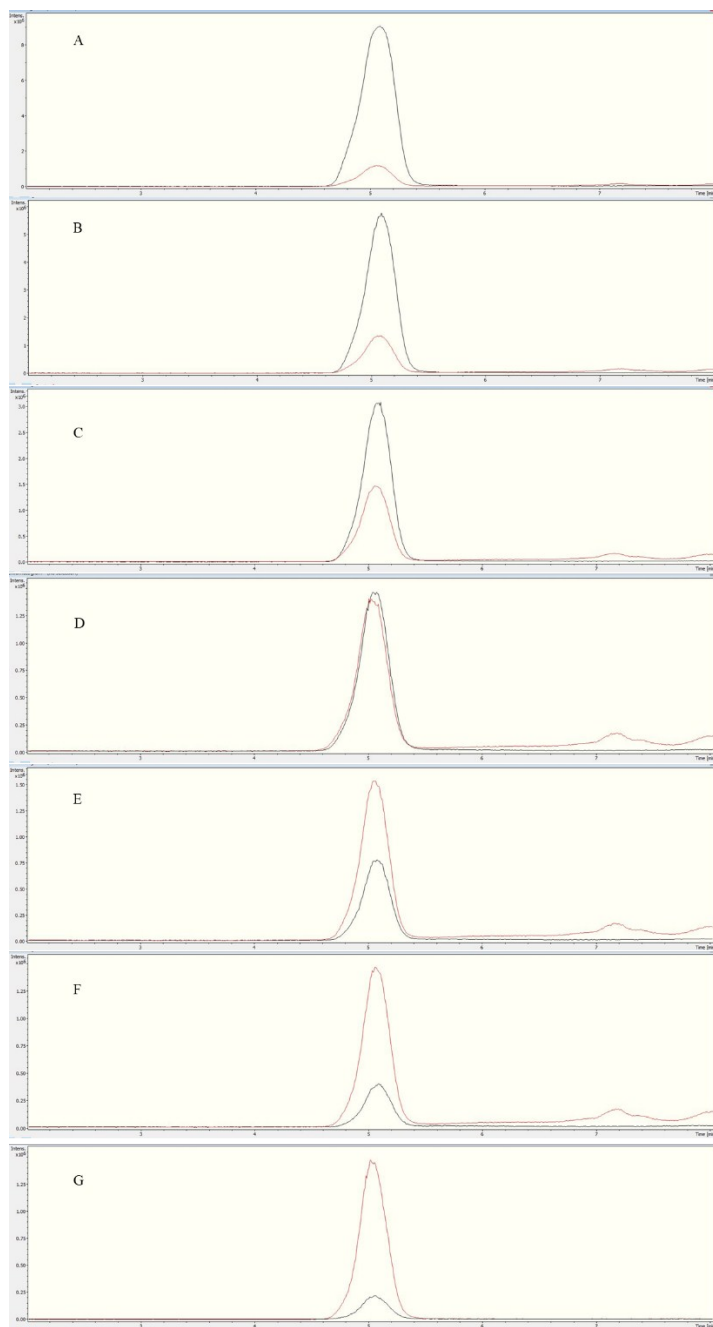

**Fig. S1** EIC calibration curve of MDMA (black) using 500 ng/mL MDMA-d<sub>5</sub> (red) at (A) 4.000 µg/mL, (B) 2.000 µg/mL, (C) 1.000 µg/mL, (D) 500.0 ng/mL, (E) 250.0 ng/mL, (F) 125.0 ng/mL, and (G) 62.50 ng/mL.

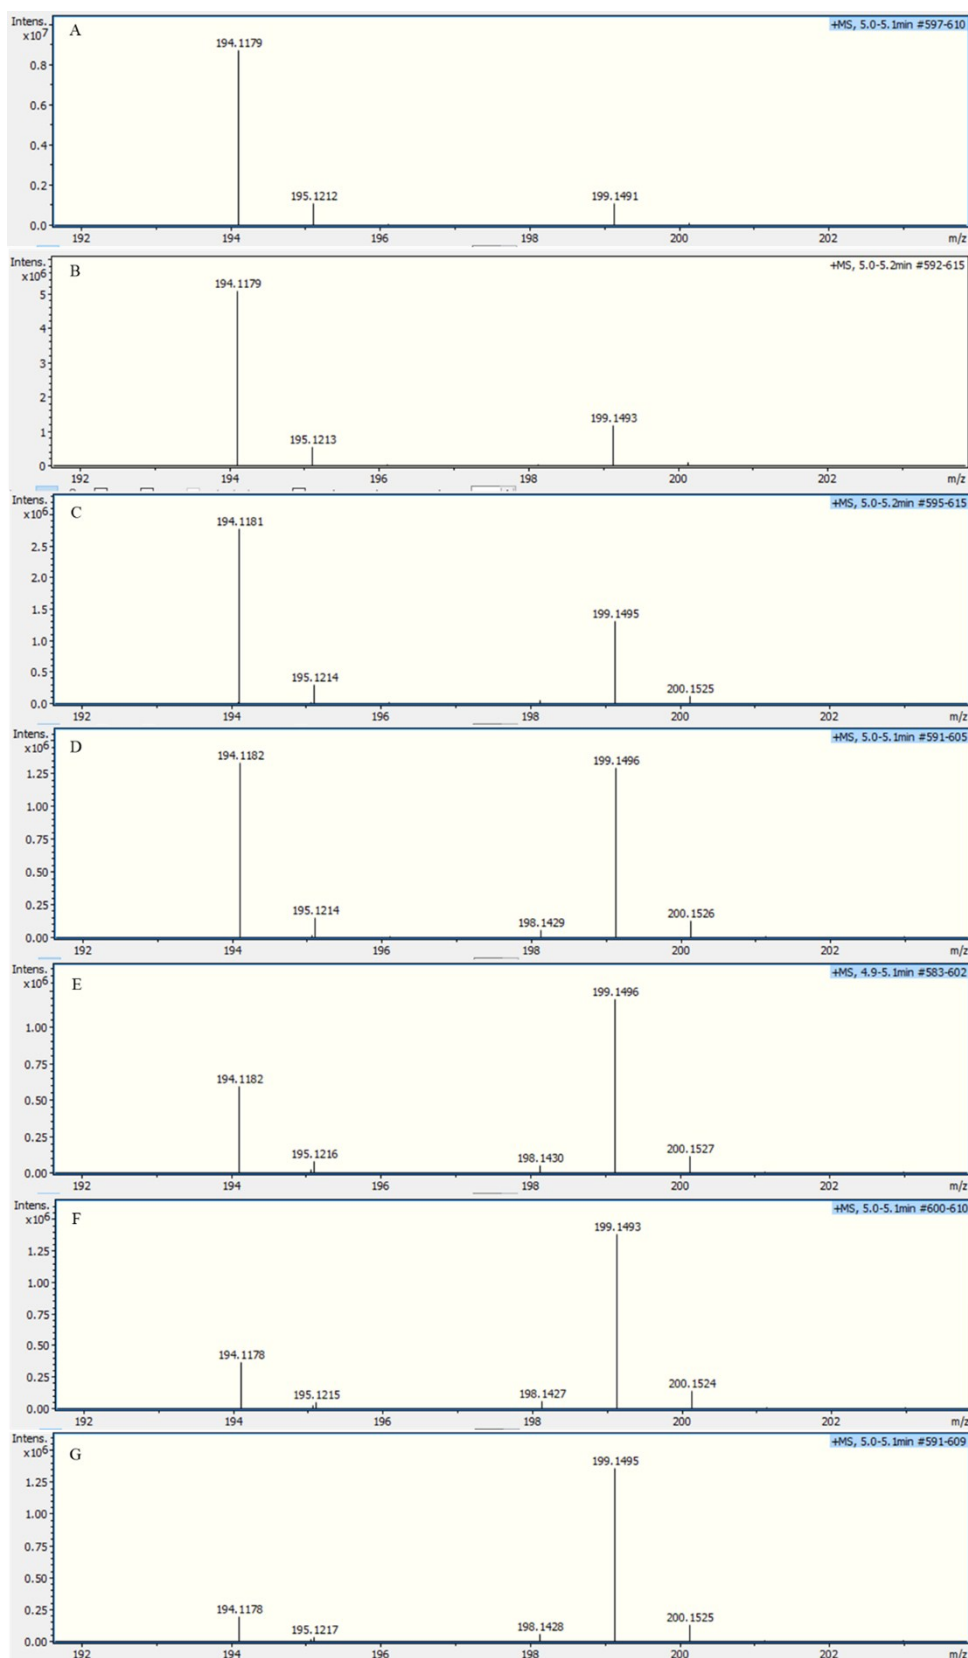

**Fig. S2** Compound spectra of the EIC calibration curve of MDMA (194 [M+H]<sup>+</sup>) using 500 ng/mL MDMA-d<sub>5</sub> (199 [M+H]<sup>+</sup>) as IS at (A) 4.000 μg/mL, (B) 2.000 μg/mL, (C) 1.000 μg/mL, (D) 500.0 ng/mL, (E) 250.0 ng/mL, (F) 125.0 ng/mL, and (G) 62.50 ng/mL.
